# Supplementary material
Source: MDPI journal article supplement (https://www.mdpi.com/2073-4352/11/5/522)
Supplement: s1 [file s1 › crystals-1188863-supplementary.pdf]

## Characterization data

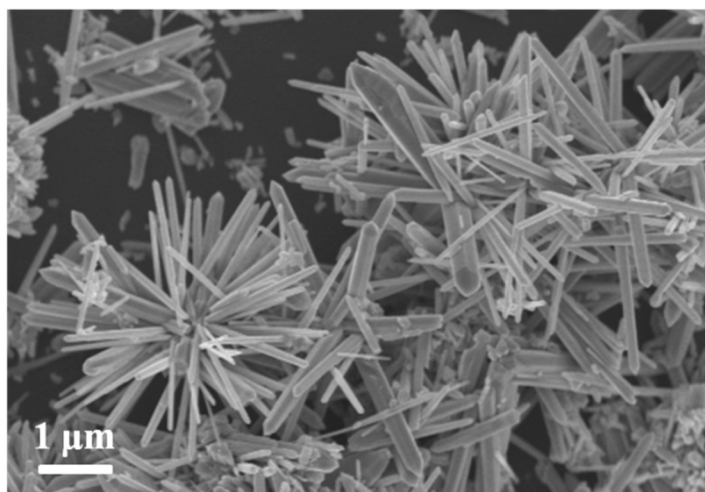

Figure.S1 SEM micrographs of ZnO without CTAB

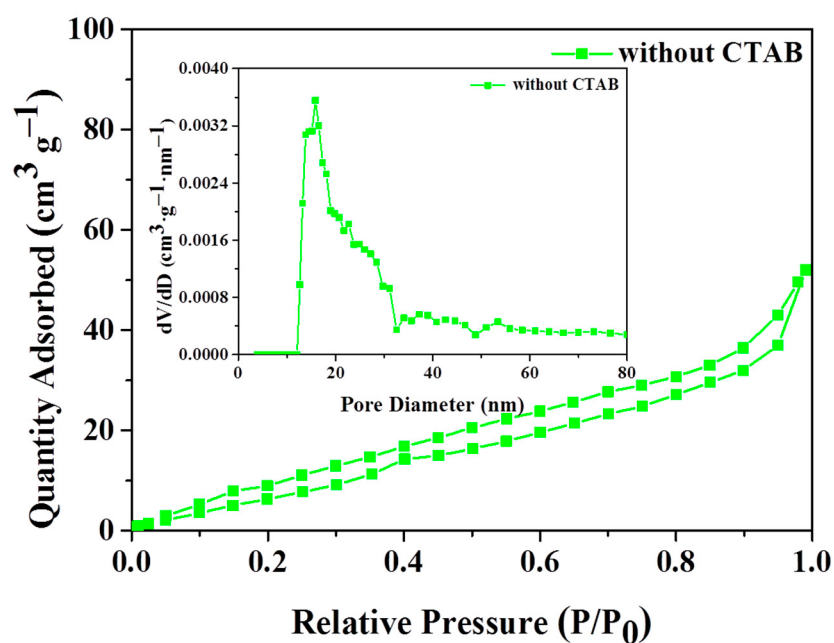

Figure. S2  $\text{N}_2$  adsorption and desorption and (inset) pore size distribution curves of ZnO without CTAB

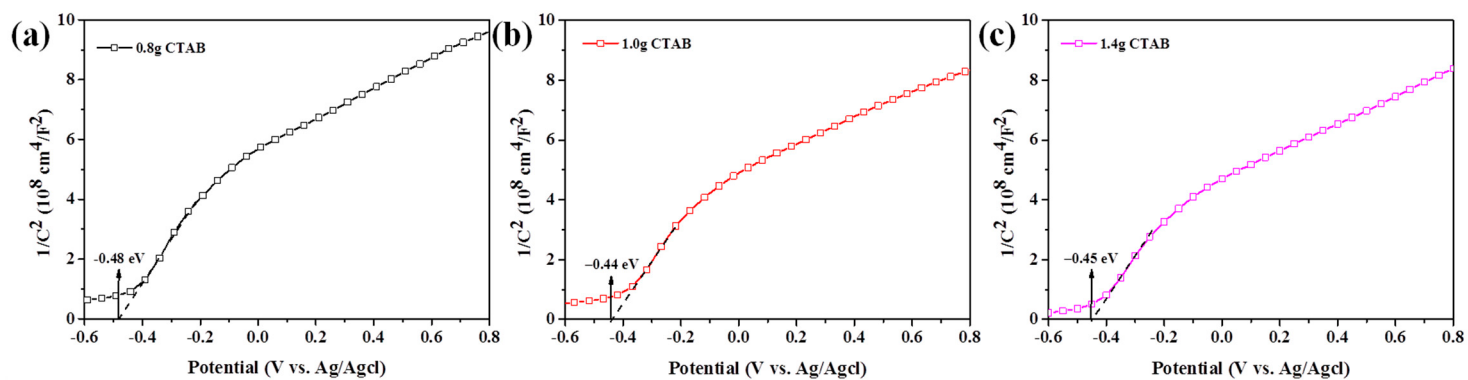

Figure. S3 The Mott-Schottky plots of samples with different contents of CTAB
